# Supplementary material
Source: PubMed Central journal article supplement (PMC7990684)
Supplement: NIHMS1649786-supplement-1.pdf [file NIHMS1649786-supplement-1.pdf]

## Supplemental Information

**Title:** Structural basis for non-radical catalysis by TsrM, a radical SAM methylase

**Authors:** Hayley L. Knox<sup>1</sup>, Percival Yang-Ting Chen<sup>4</sup>, Anthony J. Blaszczyk<sup>2</sup>, Arnab Mukherjee,<sup>1</sup> Tyler L. Grove<sup>3</sup>, Erica L. Schwalm<sup>1</sup>, Bo Wang<sup>1</sup>, Catherine L. Drennan<sup>4,6,5\*</sup> and Squire J. Booker<sup>1,2,5\*</sup>

**Affiliations:** The <sup>1</sup>Department of Chemistry, the <sup>2</sup>Department of Biochemistry and Molecular Biology, and the <sup>5</sup>Howard Hughes Medical Institute, The Pennsylvania State University, University Park, Pennsylvania 16802, USA.

The <sup>3</sup>Department of Biochemistry, Albert Einstein College of Medicine, Bronx, New York

The <sup>4</sup>Department of Chemistry, the <sup>6</sup>Department of Biology, and the <sup>5</sup>Howard Hughes Medical Institute, The Massachusetts Institute of Technology, Cambridge, Massachusetts, 02139, USA.

## Table of Contents

**Supplementary Figure 1:** Comparison of RS core folds of *KsTsrM* and *E. coli* pyruvate formate-lyase activating enzyme

**Supplementary Figure 2:** Comparison of aza-SAM binding in *KsTsrM* with SAM binding in RlmN

**Supplementary Figure 3:** Structure of aza-SAM (S-5'-azamethionine-5-deoxyadenosine)

**Supplementary Figure 4:** Double reciprocal plots of initial rates of MeTrp formation at varying concentrations of SAM and fixed concentrations of Trp

**Supplementary Figure 5:** Time-dependent formation of MeTrp under single-turnover condition

**Supplementary Figure 6:** Double reciprocal plots of initial rates of MeTrp formation at varying concentrations of SAM in the presence of dcSAM

**Supplementary Figure 7:** Hypothetical kinetic scheme for the TsrM reaction

**Supplementary Figure 8:** Alignment of nine TsrM homologs

**Supplementary Data Table 1.** Data collection and refinement statistics for *KsTsrM* with and without substrate bound

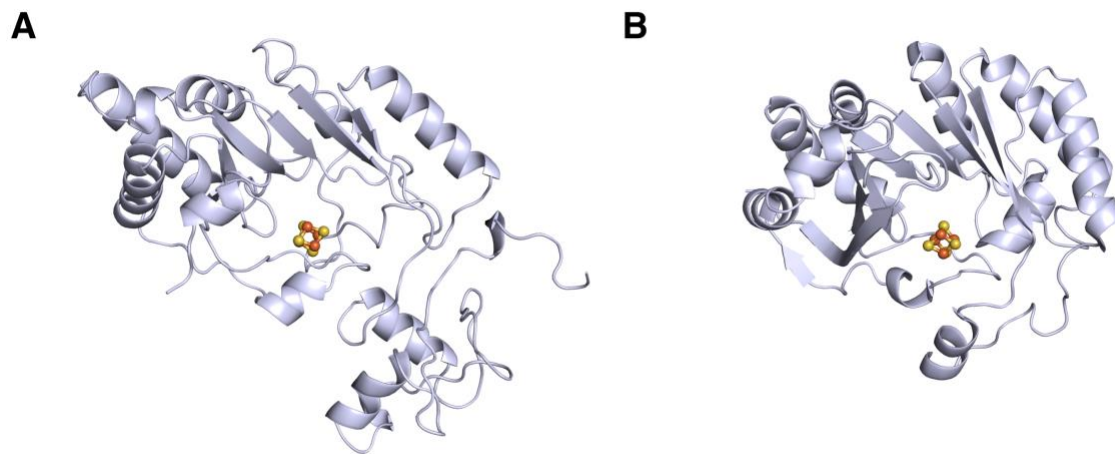

**Supplementary Figure 1.** Comparison of RS core folds of (A) *KsTsrM* and (B) *E. coli* pyruvate formate-lyase activating enzyme (PDB: 3CF8).

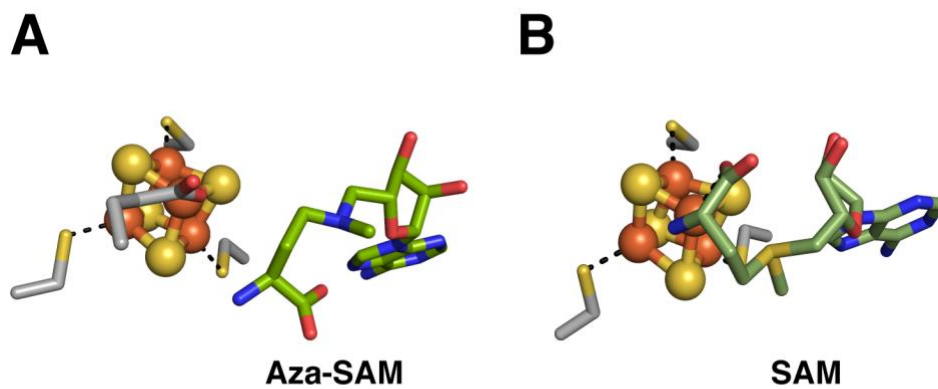

**Supplementary Figure 2.** Comparison of **(A)** aza-SAM binding in *KsTsrM* and **(B)** SAM binding in *RlmN* (pdb:3RFA). In this figure, the orientation of the cluster is maintained to show better the differences in the SAM and aza-SAM conformations.

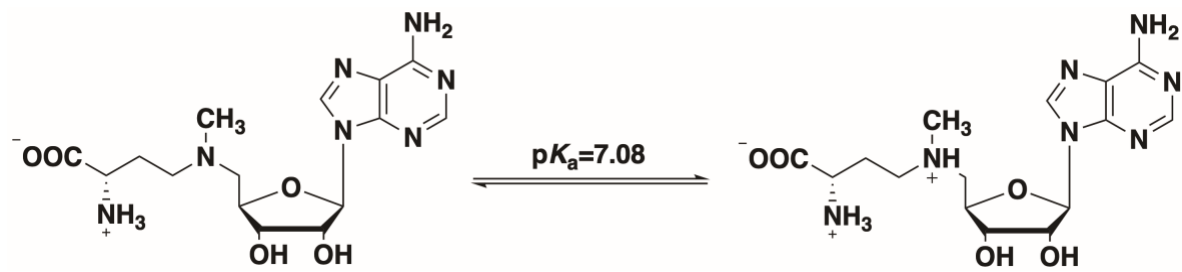

**Supplementary Figure 3.** Structure of aza-SAM (S-5'-azamethionine-5-deoxyadenosine).

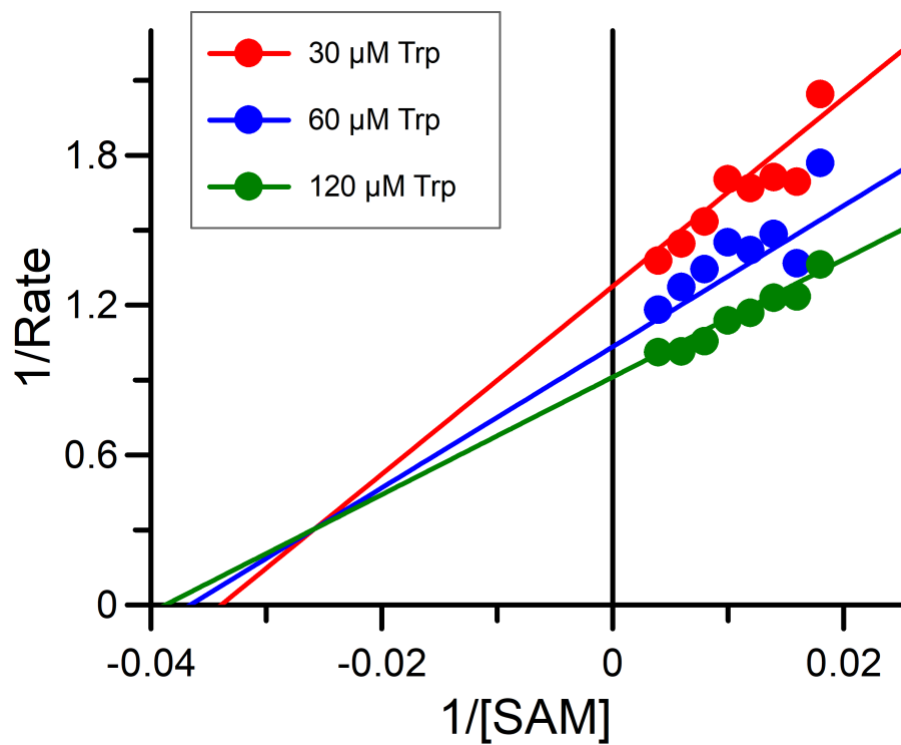

**Supplementary Figure 4.** Double reciprocal plots of the initial rates of MeTrp formation at varying concentrations of SAM (55 – 250 μM) and fixed concentrations of Trp (30, 60, and 90 μM). The data were fitted globally to Equation 1 using GraFit (Erithacus Software).

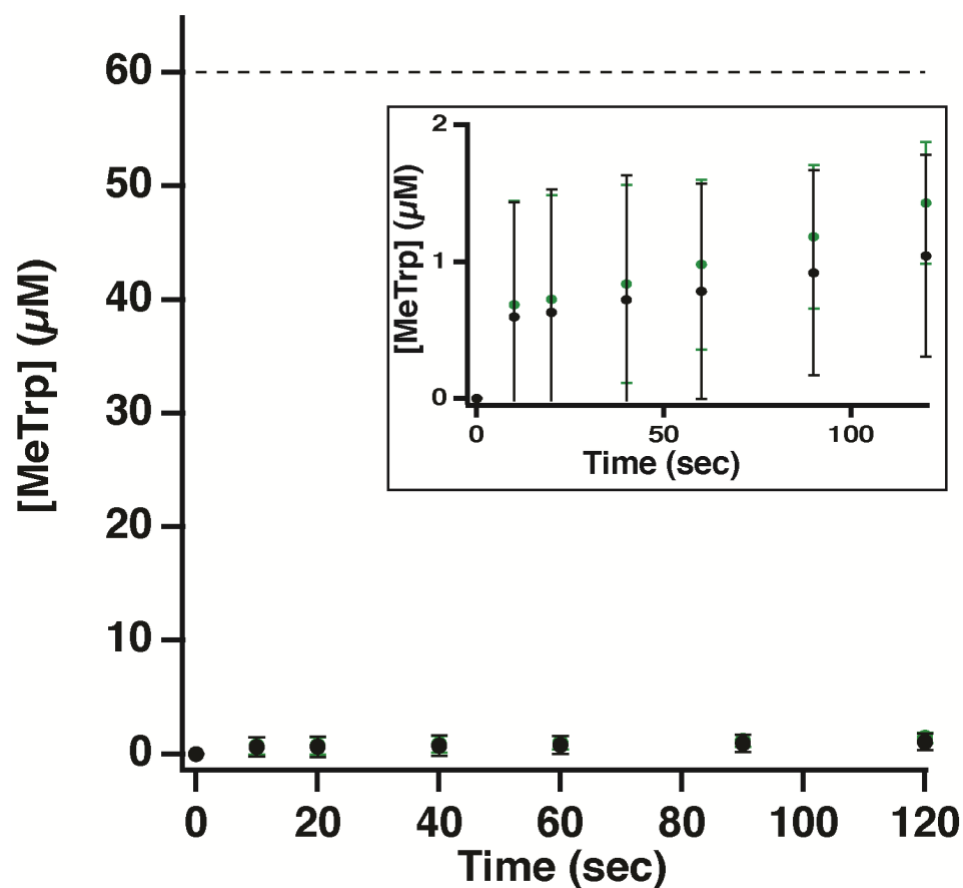

**Supplementary Figure 5.** Time-dependent formation of MeTrp under single-turnover conditions. Reactions contained pre-methylated TsrM (60  $\mu\text{M}$ ) and no SAM (black dots) or dcSAM (1 mM) (green dots). The inset represents a reduced Y-axis scale to allow better visualization of the activity. Error bars represent the standard deviation of triplicate determinations, with the central point representing the average.

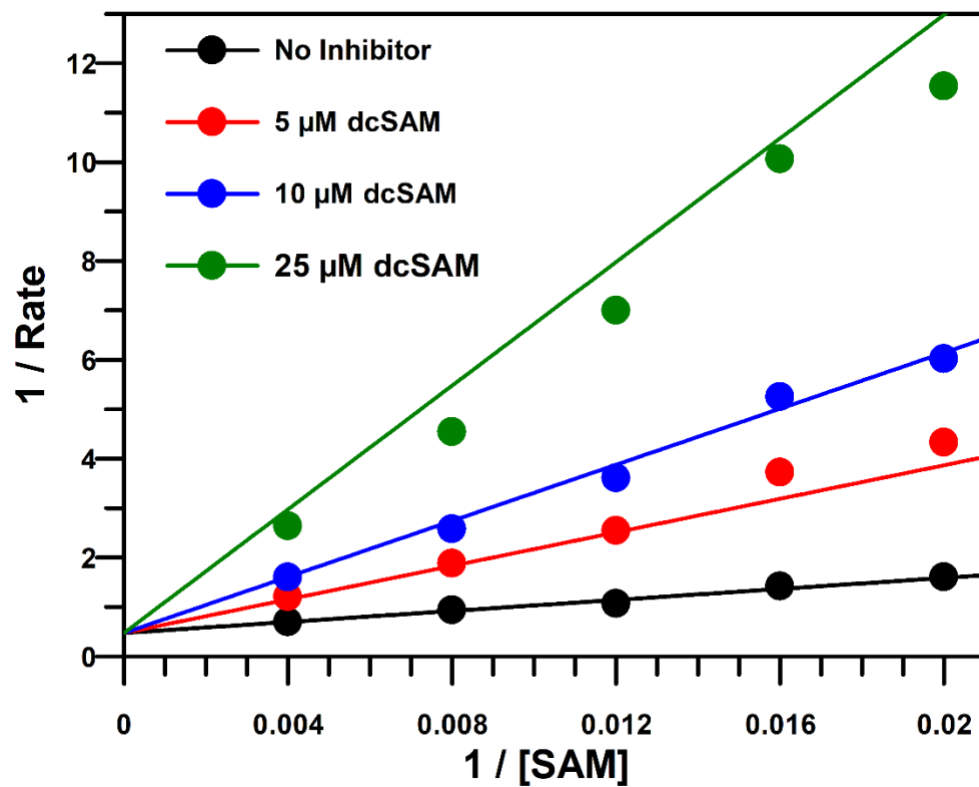

**Supplementary Figure 6.** Double-reciprocal plots of the initial rates of MeTrp formation at varying concentrations of SAM and dcSAM. The data were fitted globally to Equation 2 using GraFit (Erithacus Software).



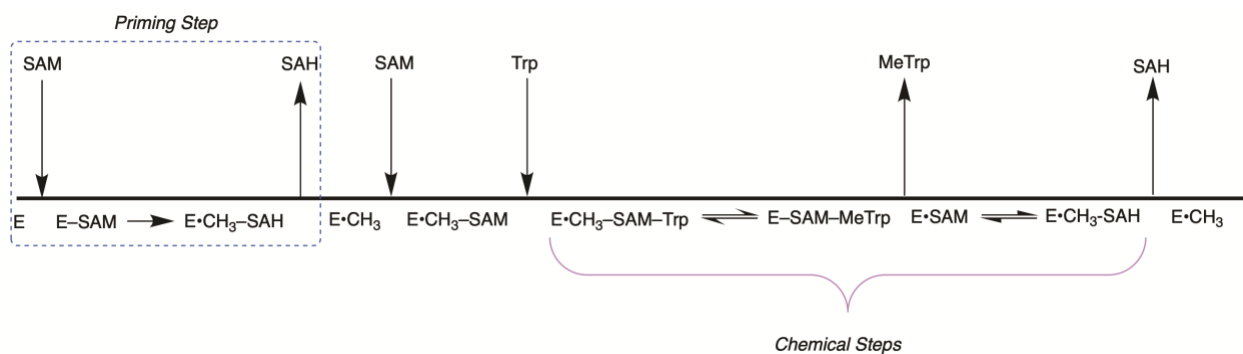

**Supplementary Figure 7.** Kinetic hypothesis for the TsrM reaction. In the priming step, SAM and a reducing agent are used to convert OHCbl or cob(II)alamin to MeCbl (E-CH<sub>3</sub>). Upon release of SAM, a second SAM molecule binds to the E-CH<sub>3</sub> state of TsrM, which is followed by the binding of Trp. Methyltransfer from MeCbl to Trp takes place with assistance from SAM (chemical steps), affording cob(I)alamin. Upon release of MeTrp, SAM methylates cob(I)alamin to regenerate MeCbl, and SAH is released.

SlTsrM 1 ML----RKGTV<sup>↓</sup>ALINPNQIHPPPIAPYALDVLTTALEASGF<sup>↓</sup>EAHVLDLTFHLLDDWRQTLRD  
 SSTsrM 1 MA----HKGIITL<sup>↓</sup>INPNQIYPPPIAPYALDVLTTALEAEGFETHVLDLTFHVG<sup>↓</sup>DWKQALRD  
 McTsrM 1 MDGVLVTRGLVTLVNP<sup>↓</sup>NKVHPPIAPYALDVLTTALEHSGY<sup>↓</sup>TVEVVDLTFRRDDWQVVVAE  
 KsTsrM 1 MS-----RLVLLVNP<sup>↓</sup>NKVHPPIAPYALDVLTTALEDEGFEVEVLDLTFRRDDWKTCLHE  
 KcTsrM 1 MS-----GPILLVNP<sup>↓</sup>NKVHPPIAPYALDVLTTALEDAGFEVEVLDLTFRRDDWKTCLHE  
 ActTsrM 1 MS-----SGLITLVNP<sup>↓</sup>NKVFPPIAPYGLDVLTTALEQAGFDV<sup>↓</sup>DVLDLTFRRDEWKSFLAE  
 LaTsrM 1 MS-----RGLVTLVNP<sup>↓</sup>NKVHPPIAPYALDVLTTLSLESAGFEVEVVDLTFHRRDDWKTFLTE  
 Str1TsrM 1 MT-----DKNLVTLVNP<sup>↓</sup>NLVHPPITPYALDITLST<sup>↓</sup>SLEAAGFEAEVLDLTLVRDHWRAAVHR  
 Str2TsrM 1 MS-----SGLVTLVNP<sup>↓</sup>NLVHPPITPYALDITLGT<sup>↓</sup>SLEAAGFDVEVLDLCLDREGWSTRVEQ

SlTsrM 57 YFRAERPLLVGV<sup>↓</sup>T<sup>↓</sup>CRNTDTVYALEQRP<sup>↓</sup>FVDGYKAVIDEVRR<sup>↓</sup>LTAAPV<sup>↓</sup>VAGGVGFSTMPFA  
 SSTsrM 57 YFDSSRPLLVGV<sup>↓</sup>T<sup>↓</sup>CRNTDTVYAFEQRP<sup>↓</sup>FIDGYKAVIDEVRGL<sup>↓</sup>TAAPV<sup>↓</sup>IAGGVGFSTMPFA  
 McTsrM 61 YFSVRQPLLVGV<sup>↓</sup>T<sup>↓</sup>VRNTDTTYALEQRP<sup>↓</sup>FVDEHREIIRAVRR<sup>↓</sup>RTNAPLV<sup>↓</sup>VAGGIGFSTMPFA  
 KsTsrM 55 YFAERSPMLVGV<sup>↓</sup>T<sup>↓</sup>VRNTDTVYAFEQRP<sup>↓</sup>FVGEHREIITEIRRL<sup>↓</sup>TDAPV<sup>↓</sup>VGGGIGFSTMPFA  
 KcTsrM 55 YFAERSPMLVGV<sup>↓</sup>T<sup>↓</sup>VRNTDTVYAFEQRP<sup>↓</sup>FVGEHREIITEIRRL<sup>↓</sup>TDAPV<sup>↓</sup>VGGGIGFSTMPFA  
 ActTsrM 56 YFAERTPLLVGV<sup>↓</sup>S<sup>↓</sup>VRNTDTVYALEQRP<sup>↓</sup>FVGEHKEIITEVM<sup>↓</sup>R<sup>↓</sup>LSDAPLV<sup>↓</sup>CGGIGFSTMPFA  
 LaTsrM 56 YFTTRDPMLVGI<sup>↓</sup>T<sup>↓</sup>VRNTDTVYAFEQRP<sup>↓</sup>FVGEHKEIITEIT<sup>↓</sup>RLTEAPLV<sup>↓</sup>VAGGIGFSTMPFA  
 Str1TsrM 57 YFAERSPFLVGV<sup>↓</sup>T<sup>↓</sup>VRNTDTIYPQEQRV<sup>↓</sup>FLDSHREI<sup>↓</sup>IETIREV<sup>↓</sup>TSAPV<sup>↓</sup>VGGGVGFSSMPFA  
 Str2TsrM 56 YFSRRSPLLVGV<sup>↓</sup>T<sup>↓</sup>IRNTDTIYPQEQRV<sup>↓</sup>FLGSHR<sup>↓</sup>KIIAAIAR<sup>↓</sup>RTQAPIV<sup>↓</sup>GGGVGFSSMPFA

SlTsrM 117 LVDYFGIEYGVKGPGEKIICDLARALAEGRSADRIHIPGLLVN<sup>↓</sup>RGP<sup>↓</sup>GNVTRVAPPALDPR  
 SSTsrM 117 LVDYFDVDFGVKGPGEKIICDLAQAFV<sup>↓</sup>EGRTAD--HIPGL<sup>↓</sup>LINRGP<sup>↓</sup>QVTRVPPV<sup>↓</sup>LNGR  
 McTsrM 121 LVDYFGVDFGVKGPGEV<sup>↓</sup>IICDLADALAEGRDPR--SVGGL<sup>↓</sup>LVNEG<sup>↓</sup>GGRVSV--PA--RPPV  
 KsTsrM 115 LVEYFGIEYGVKGPGEKILCELATAISEGRDTA--GIPGL<sup>↓</sup>IRN<sup>↓</sup>TERGAVR--VPPAV<sup>↓</sup>LTVR  
 KcTsrM 115 LVEYFGIDYGVKGPGEKILCELAVATAEGRDTS--AIPGL<sup>↓</sup>IRN<sup>↓</sup>TENGAVR--TPPAFL<sup>↓</sup>LTVR  
 ActTsrM 116 LVEYFGVDFGVKGPGEQ<sup>↓</sup>ILV<sup>↓</sup>D<sup>↓</sup>LADAVATGRDPA--TVPGL<sup>↓</sup>IRN<sup>↓</sup>TPEGVTR--VPPV<sup>↓</sup>LRLP  
 LaTsrM 116 LVDYFGVDYGVKGPGEKIVV<sup>↓</sup>D<sup>↓</sup>LADALATGRDVS--TVDGL<sup>↓</sup>IRN<sup>↓</sup>TPDGIVR--TSSALT<sup>↓</sup>PL-  
 Str1TsrM 117 LVDYFGIDFGVKGPGE<sup>↓</sup>LT<sup>↓</sup>V<sup>↓</sup>LLAEALANGRSTT--AVPGL<sup>↓</sup>IVN<sup>↓</sup>DHVGHVT--ETPAGD<sup>↓</sup>P--  
 Str2TsrM 116 LVDYFNLD<sup>↓</sup>FGVKGPGEV<sup>↓</sup>TLV<sup>↓</sup>R<sup>↓</sup>LAEALAAATGD<sup>↓</sup>GS--RVPG<sup>↓</sup>VIAKDHAGQIR--ENNHGSA--

SlTsrM 177 AAPAPS--SSPSPAPSSSSAPVPVPLSFAAVGH<sup>↓</sup>HESRAWQAE<sup>↓</sup>TELPY<sup>↓</sup>TRRS<sup>↓</sup>SGEPYKVD  
 SSTsrM 175 AAAAPAPVAAPA----PL----PAPAPLSFGAVGRY<sup>↓</sup>ESRAWQAE<sup>↓</sup>TERS<sup>↓</sup>YTRRS<sup>↓</sup>SGEPYKID  
 McTsrM 177 AGAGP-----LARA<sup>↓</sup>GHNESRLWQV<sup>↓</sup>NRRDSYHRR<sup>↓</sup>SGDPLKVD  
 KsTsrM 172 HGKTQP-----AEPT<sup>↓</sup>GQFEP<sup>↓</sup>RVWQVD<sup>↓</sup>QLSVYRRR<sup>↓</sup>SGVPRKVD  
 KcTsrM 172 HGETQQ-----ADPT<sup>↓</sup>GRFEP<sup>↓</sup>RVWQVD<sup>↓</sup>RLSVYRRR<sup>↓</sup>SGVPNRVD  
 ActTsrM 173 HGLSAP-----VSPT<sup>↓</sup>ADGED<sup>↓</sup>RVWQV<sup>↓</sup>ERSGSYRRR<sup>↓</sup>SGOPYKVD  
 LaTsrM 172 -----LQVG<sup>↓</sup>PTVVK<sup>↓</sup>TWQVD<sup>↓</sup>GEGTY<sup>↓</sup>IRRS<sup>↓</sup>GD<sup>↓</sup>KYKVD  
 Str1TsrM 172 -----QIHR<sup>↓</sup>GRARM<sup>↓</sup>VNVV<sup>↓</sup>TPY<sup>↓</sup>TRRS<sup>↓</sup>SGVPHKVD  
 Str2TsrM 171 -----RLDR<sup>↓</sup>GRTR<sup>↓</sup>L<sup>↓</sup>VN<sup>↓</sup>LVT<sup>↓</sup>PYRR<sup>↓</sup>YS<sup>↓</sup>GRE<sup>↓</sup>DKVD

SlTsrM 235 NLRYYREGGLGSILTKNGCVYKCS<sup>↓</sup>FCV<sup>↓</sup>EPDAKGTQFARRG<sup>↓</sup>ITAVVDEMEALTAQGIHDLH  
 SSTsrM 227 NL Y<sup>↓</sup>YR GGLGSILTK<sup>↓</sup>SGCVYKCS<sup>↓</sup>HCV<sup>↓</sup>EPDAKGT FARR VAAV<sup>↓</sup>DEMESL AQGI DLH  
 McTsrM 213 NLAYYRQSGIGSILTKNGCVYRCSHCVEPDAKGTQFARRG<sup>↓</sup>IPAVVDE<sup>↓</sup>TESLVAQGVHDLH  
 KsTsrM 209 NLEYYRRGGLGSILTKNGCAYRCSHCVEPDAKGTTRYGQRELASVVDEMESLAAQGILDQH  
 KcTsrM 209 NLQYYRRGGLGSILTKNGCAYRCSHCVEPDAKGTTRYGQRELASVVDEMESLAAQGILDQH  
 ActTsrM 210 NLQHYHGGGLGSILTKNGCTYRCAHCVEPNAKGNRFR<sup>↓</sup>RDVA<sup>↓</sup>AVVDEM<sup>↓</sup>QSLTEQGVLDLH  
 LaTsrM 202 NGEYYKRGGLAGILTKSGCVYRCAHCVEPDAKGGAVARRDVA<sup>↓</sup>AVVDEM<sup>↓</sup>QSLAAQGILDQH  
 Str1TsrM 199 NLEYYRRGGLGNILTRNGCPFACTHCVEPDAKGT<sup>↓</sup>RFALRAPSAV<sup>↓</sup>ADEM<sup>↓</sup>ESLVEQGVHDLH  
 Str2TsrM 198 NLAYYRLGGLGNILTKNGCTYACTHCVEPDAKGS<sup>↓</sup>RFALRPPGAVVDEM<sup>↓</sup>HSLLEQGVHDLH

SlTsrM 295 TTDSEFNLSIAH<sup>↓</sup>SKNLLREIVRRRDH<sup>↓</sup>DATSPL<sup>↓</sup>RDLRLWVYCQPSPFDEEF<sup>↓</sup>AE<sup>↓</sup>L<sup>↓</sup>LAAAGCA  
 SSTsrM 287 TTDSEFNLSISH<sup>↓</sup>SKSLLREI<sup>↓</sup>TRRREGDPASPL<sup>↓</sup>RHLRLWVYCQPPFDEEF<sup>↓</sup>AE<sup>↓</sup>L<sup>↓</sup>LAAAGCA  
 McTsrM 273 TTDSEFNLAIGH<sup>↓</sup>SKALLREIVRRRNTD<sup>↓</sup>HSGPL<sup>↓</sup>HDLRLWVYCQPPFDEEF<sup>↓</sup>AE<sup>↓</sup>L<sup>↓</sup>LAAAGCA  
 KsTsrM 269 TTDSEFNLSIAHAKNLLREIVRRRHAD<sup>↓</sup>PDNPLNRLRLWVYCQPSPFDEEF<sup>↓</sup>FAD<sup>↓</sup>L<sup>↓</sup>LAAAGCR  
 KcTsrM 269 TTDSEFNLSVVHAKNLLREIVRRRHAD<sup>↓</sup>PENPLNSLRLWVYCQPSPFDEEF<sup>↓</sup>FAD<sup>↓</sup>L<sup>↓</sup>LAAAGCR  
 ActTsrM 270 TTDSEFNLSIAHAKSVLREIVRRKRAD<sup>↓</sup>SGNPL<sup>↓</sup>NLRLWVYCQPSPFDEEF<sup>↓</sup>AG<sup>↓</sup>L<sup>↓</sup>LAEAGCQ

|          |     |                                                                             |
|----------|-----|-----------------------------------------------------------------------------|
| LaTsrM   | 262 | TTDSEFNLSIQHAKNVLRREIVRRKHASAAANPLNNLRLWVYCQSPFDEEFADLLSAAGCQ               |
| Str1TsrM | 259 | TTDSEFNLNISHSKKVLREIIRRKQASARSPHLELRLWIIYVQPAPFDREYAELLAEAGCA               |
| Str2TsrM | 258 | TTDSEFNLNIAHSKRVLREIIRRKRADPSSPLHRLRLWVYVQPAPFDREYAALLAEAGCA                |
| S1TsrM   | 355 | GVNIGADHTRPEMLDGWKVTAKGTRYDFADTERLVQLCHRNGMLTMVEALFGMPGETLE                 |
| SSTsrM   | 347 | GVNVGADHVRPEMLDAWKVTGKGTRYDFSDTVRLVELSHRYGMLTMVEALFGMPGENLS                 |
| McTsrM   | 333 | GVNVGADHVRRLDLDGWKITAGGSQFYAFEDTVRLVELSHRYGMRTMVEALFGMPGETRE                |
| KsTsrM   | 329 | GVNVGSDHIRPELLSGWKVTEKGGTYTTFEDTERLVRLCRRERGITLTMVEALFGMPGETPE              |
| KcTsrM   | 329 | GVNVGSDHIRPEVLSGWKVTEKGGTYTTFADTERLVRLCHERGITLTMVEALFGMPGETPE               |
| ActTsrM  | 330 | GVNVGSDHIRADLLQGWKVTGGKTYTTFADTERLVRLCHENGLKTMVEALFGMPGETME                 |
| LaTsrM   | 322 | GVNVGSDHIREVLSGWKVTEKGGTYTTFEDTERLVRLCNERGITKTMVEALFAMPGETWD                |
| Str1TsrM | 319 | G1NVAPDHVRDEVLDGWKVTGKGRRFYGAEDVGRVCGWAHGLGMLTMVEVLLGMPGETEE                |
| Str2TsrM | 318 | G1NVAPDHMRPDLLDGWKVTGKGHRFYDVGDAEVCWAREYD1PTMVEVLLGMPGETAS                  |
| S1TsrM   | 415 | TMRDCVDRMELD DATVTGFSGLRLLPYMG LAKSLAEQCDGVRTV RGLQSNNASGPIVLK              |
| SSTsrM   | 407 | TMRECVDRMMALD ATVTGFSGLRLFPYMDL A1SLAEKCDGVRTLPGLQSNNA1RPIVLK               |
| McTsrM   | 393 | TMRRCVDEFMALDAHV1TGFSGLRLFPY1ALG1RMAEQCAGVRTVPGLQSNNA1REPIVLK               |
| KsTsrM   | 389 | TVRACVDAFMALD ATVTGFSGLRLFPY1PMG1E1AEQ1CAGVRTAPGLQSN1ADGPIVLK               |
| KcTsrM   | 389 | TVRACVDAFMALD ATVTGFSGLRLFPY1PMGMD1AEQ1CAGERTVPGLQSN1ADGPIVLK               |
| ActTsrM  | 390 | TMRECVDAFMALD ATVTGFSGLRLFPY1PLGVD1AQ1C1D1GVRTAPGLQSN1ATEPIVLK              |
| LaTsrM   | 382 | TMRDCVQAFMALD ATVTAF1SLGLRLFP1H1PLG1S1AEQ1CAGVRTMPGLQSN1ANGPI1LK            |
| Str1TsrM | 379 | TVRECVRT1DLGATV1VGY1TLG1R1V1F1P1YS1PLGRN1LAARSNG1STS1PG1QSNT1ATEPI1LLA      |
| Str2TsrM | 378 | TLRDCVRST1ALNATV1VGY1TLG1R1V1F1P1YS1PLGQ1QLAE1L1SGG1TSAV1PGV1QSNT1ATEPI1MLA |
| S1TsrM   | 475 | QLHQCDGPIEYERQFMFDES1GDFRLVCYFSPDLPEAPGTADS1PDGIWRASVDFLWDRI1PK             |
| SSTsrM   | 467 | PLRKCSSPIEYERQFMFDES1GFEFRLVCYFSPDLPEAPGTVGS1PHGIWQASVDFLWDHI1PK            |
| McTsrM   | 453 | PLAMCSGPVEYERQFMFDD1GGFRLVCYFSPDLPEDPARVSD1PAGRWQR1SVQFLWDQ1IPA             |
| KsTsrM   | 449 | PLRMCASPAEYERQFMFDEH1GNFRLVCYFSPGLLPD1PARAAD1PEERWHGAVADLWAL1DP             |
| KcTsrM   | 449 | PLRMCASPAEYERQFMFDEH1GNFRLVCYFSPDLLPD1PARATD1PEERWHGAVTDLWAL1DP             |
| ActTsrM  | 450 | PLAACSGPAEYERQFMFDEH1GDFRLVCYLS1PGLAED---VTN1PSVQWERT1VERLWD1L1VDP          |
| LaTsrM   | 442 | PLSMCSGLVEYEKQFM1DERGEFRLVCYFSPDLLEDAGTNT1DPNGRWSRT1VEY1LWSL1VDP            |
| Str1TsrM | 439 | PLDQCADTVSYERQFMFD1GHGRFRPVY1YFSPDLPEGDAGSPG1PSDRWEK1SLALLWE1CVPA           |
| Str2TsrM | 438 | PRRRCADAAAYERQFMFD1ARGGFRPVY1YFSP1ELPDG-AGATAPGDRWQSS1LELLWNCV1PF           |
| S1TsrM   | 535 | SEQYRVMLPTLSGSS1ENDNNYADNPFLTSLNRKGYTGAFWAHWRDREAIMSGATLPLGEL               |
| SSTsrM   | 527 | SEYYRVMLPTISGSS1ENDNNYADNPFLTSLNRQGYTGAFWAHWRDREAIMSGTGA-LGEL               |
| McTsrM   | 513 | REHHRVMLPTVAGMSEH1DNNYADNPFL1LSL1CRLGYS1GAFWSHWRERRS1L1QE1AHD-RGVL          |
| KsTsrM   | 509 | ADHHRVMLPTVEGMSEH1DNNYADNPFLTSLGGLGYTGAFWSHWRGREE1IMRKARE-AAAQ              |
| KcTsrM   | 509 | ADHHRVMLPTVEGMSEH1DNNYADNPFLTSLGGLGYTGAFWSHWRGREE1IMRRARE-SAEA              |
| ActTsrM  | 507 | AEHHRVMLPTLGGTSE1DNNYADNPFLTSLSQLGYTGAFWSHWRDREAIMREARE-AGIL                |
| LaTsrM   | 502 | ADYHRVMLPTLAGMSE1ENNYADNPFLIGL1TSLGYK1GAFWSHWREERE1L1REAQL-AGVV             |
| Str1TsrM | 499 | ADRPRVMLPTSPGLS1PEDNNYADNP1LLLR1MNELGCTGAFWSHW1PQREAIMRGAL-----             |
| Str2TsrM | 497 | GDRDRVMLPTAPGLS1PEDNNYADNP1LLRL1TELGYTGAY1WSHW1PDRYK1IMGSQSP-AN--           |
| S1TsrM   | 595 | A--EAVR-----                                                                |
| SSTsrM   | 586 | AV-EAAR-----                                                                |
| McTsrM   | 572 | E--AATG-----                                                                |
| KsTsrM   | 568 | S----SHLPTPV                                                                |
| KcTsrM   | 568 | AG-QSSH1LPTPV                                                               |
| ActTsrM  | 566 | PTPEAGR-----R                                                               |
| LaTsrM   | 561 | -----S                                                                      |
| Str1TsrM | 553 | -----K                                                                      |
| Str2TsrM | 554 | -----A                                                                      |

**Supplementary Figure 8.** Alignment of nine TsrM homologs with associated UniProt accession codes. Black indicates strictly conserved, light grey is partially conserved. The homologs are from the following species, with indicated percent identity relative to TsrM from *Streptomyces laurentii*: *Streptomyces laurentii* (SITsrM, C0JRZ9, 100%), *Streptomyces sioyaensis* (SSTsrM (SioT), C0JRX4, 81.3%), *Micromonospora carbonacea* (McTsrM, A0A1C4YSC7, 66.8%), *Kitasatospora setae* (KsTsrM, E4N8S5, 64.9%), *Kitasatospora cheerisanensis* (KcTsrM, A0A066YXN6, 64.7%), *Actinoplanes* sp. (ActTsrM, strain ATCC 31044) (G8SKH5, 63.7%), *Lechevalieria aerocolonigenes* (LaTsrM, A0A0F0H1M0, 61.0%), *Streptomyces* sp. AA4 (Str1TsrM, D9V2D1, 55.0%), and *Streptomyces* AA4 (Str2TsrM, D9VIE6, 55.0%). The conserved Arg residue is indicated by a red arrow above. The CXXXCXXC motif is indicated by the three blue arrows above. The conserved Glu is shown by a green arrow above.

**Supplementary Data Table 1.** Data collection and refinement statistics for *KsTsrM* with and without substrate bound.

|                                                        | Anomalous Data**          | Native <i>KsTsrM</i>     | HR Native <i>KsTsrM</i>   | <i>KsTsrM</i> + azaSAM + Trp |
|--------------------------------------------------------|---------------------------|--------------------------|---------------------------|------------------------------|
| <b>Data collection</b>                                 |                           |                          |                           |                              |
| Space group                                            | <i>P</i> 2 <sub>1</sub>   | <i>P</i> 2 <sub>1</sub>  | <i>P</i> 2 <sub>1</sub>   | <i>P</i> 2 <sub>1</sub>      |
| Cell dimensions                                        |                           |                          |                           |                              |
| <i>a</i> , <i>b</i> , <i>c</i> (Å)                     | 49.33, 104.25,<br>106.30  | 49.20, 104.02,<br>106.05 | 49.37, 103.76,<br>105.97  | 50.36, 103.08,<br>105.76     |
| $\alpha$ , $\beta$ , $\gamma$ (°)                      | 95.12                     | 95.13                    | 95.08                     | 94.77                        |
| Resolution* (Å)                                        | 30.0-2.50 (2.54-<br>2.50) | 50.0-2.00 (2.07-2.00)    | 50.0-1.67 (1.73-<br>1.67) | 50.0-2.19 (2.27-<br>2.19)    |
| <i>R</i> <sub>sym</sub> or <i>R</i> <sub>merge</sub> * | 0.08 (0.23)               | 0.07 (0.14)              | 0.12 (0.82)               | 0.17 (0.70)                  |
| <i>I</i> / $\sigma$ <i>I</i> *                         | 11.53 (3.92)              | 9.13 (3.95)              | 11.15 (2.06)              | 6.47 (1.78)                  |
| Completeness (%)*                                      | 92.7 (54.0)               | 95.0 (77.0)              | 99.9 (99.6)               | 97.1 (96.8)                  |
| Redundancy*                                            | 2.9 (1.8)                 | 2.3 (1.5)                | 6.1 (5.7)                 | 3.2 (3.2)                    |
| <b>Refinement</b>                                      |                           |                          |                           |                              |
| Resolution (Å)                                         |                           | 1.99                     | 1.67                      | 2.19                         |
| No. reflections                                        |                           | 67,947                   | 122,903                   | 53,942                       |
| <i>R</i> <sub>work</sub> / <i>R</i> <sub>free</sub>    |                           | 0.17/0.21                | 0.19/0.22                 | 0.21/0.25                    |
| No. atoms                                              |                           | 9,709                    | 9,802                     | 9,174                        |
| Protein                                                |                           | 8,679                    | 8,814                     | 8,515                        |
| Ligand/ion                                             |                           | 201                      | 270                       | 282                          |
| Water                                                  |                           | 830                      | 718                       | 377                          |
| <i>B</i> -factors (Å <sup>2</sup> )                    |                           |                          |                           |                              |
| Protein                                                |                           | 24.6                     | 19.8                      | 23.4                         |
| Ligand/ion                                             |                           | 18.5                     | 17.8                      | 18.1                         |
| Water                                                  |                           | 29.3                     | 24.8                      | 23.2                         |
| R.m.s. deviations                                      |                           |                          |                           |                              |
| Bond lengths (Å)                                       |                           | 0.007                    | 0.004                     | 0.004                        |
| Bond angles (°)                                        |                           | 1.37                     | 0.73                      | 0.67                         |
| Number of TLS groups                                   |                           | -                        | 2                         | -                            |
| PDB accession code                                     |                           |                          | 6WTE                      | 6WTF                         |

\*Values in parentheses are for highest-resolution shell. \*\*Friedel pairs scaled separately. \*\*\*all structures result from one single crystal
